# Supplementary material for: Interactive association of maternal education and peer relationship with oppositional defiant disorder: an observational study
Source: Springer Nature journal article supplement (doi:10.1186/s12888-021-03157-7), 2021-03-22
Supplement: MOESM1 [file 18990988]

**Title page**

**Interactive association of maternal education and peer relationship  
with oppositional defiant disorder : An observational study**

**Health screening questionnaire for college students**

Ming-Chia Liu, M.D.<sup>1</sup>

Jung Chen Chang, R.N., Ph.D.<sup>2,3</sup>

Chau-Shoun Lee, M.D., Ph.D.<sup>4,5\*</sup>

<sup>1</sup> Attending Physician, Department of Psychiatry, MacKay Memorial Hospital,  
Taipei, Taiwan

<sup>2</sup> Associate Professor, School of Nursing, College of Medicine, National Taiwan  
University, Taipei, Taiwan

<sup>3</sup> **Vice Chair**, Department of Nursing, National Taiwan University Hospital, Taipei,  
Taiwan

<sup>4</sup> Associate Professor and Deputy Chief, Department of Medicine, MacKay  
Medical College, New Taipei City, Taiwan

<sup>5</sup> Senior Attending Physician, Department of Psychiatry, MacKay Memorial  
Hospital, Taipei, Taiwan

**\*Corresponding Authors and Reprint Requested to:**

Chau-Shoun Lee

Department of Medicine, MacKay Medical College, No.46, Sec. 3, Zhongzheng Rd.,  
Sanzhi Dist., New Taipei City, 25245, Taiwan; Department of Psychiatry, MacKay  
Memorial Hospital, Taipei, Taiwan

E-mail: [csleepsync@gmail.com](mailto:csleepsync@gmail.com)

Tel 886-972212137

## Health screening questionnaire for college students

### I. Basic information

1. **Division of College** :  Day division  Night division
2. **Sex** :  Male  Female
3. **Department** : \_\_\_\_\_ / **Grade** : \_\_\_\_\_
4. **Age** : \_\_\_\_\_
5. **Have you ever failed in 1/2 or 2/3 of your subjects?**  Yes  No
6. **What is your parent's marital status?**  
 Married or live together  Separated  Divorced  Never married  
 Widowed( Father passed / Mother passed)  Remarried
7. **What are your parents' education levels?**  
**Father:**  Elementary school  Junior high school (9<sup>th</sup> grade)  Senior high school  College/University  Graduate institute  Not applicable/Unknown  
**Mother:**  Elementary school  Junior high school (9<sup>th</sup> grade)  Senior high school  College/University  Graduate institute  Not applicable/Unknown
8. **Current residency status:**  Live with parents  Dormitory at school  
 Rent a room  Live with relatives  Others \_\_\_\_\_
9. **Do you have a part-time job?**  
 No  Yes, less than \$6000 TWD/month  Yes, \$6001~12000 TWD/month  
 Yes, \$12001~20000/month  Yes, more than \$20001 TWD/month
10. **What is your parent's current working status?**  
**Father:**  Household  Unemployed  Industry/architecture/engineering  
 Agriculture/forestry/fishing/animal husbandry  Business(Self-employed)  
 Business(Employed)  Military/Police  Education/Government employee  
 Medicine/Health  Hospitality  Transportation  Others  
**Mother:** Household  Unemployed  Industry/architecture/engineering  
 Agriculture/forestry/fishing/animal husbandry  Business(Self-employed)  
 Business(Employed)  Military/Police  Education/Government employee  
 Medicine/Health  Hospitality  Transportation  Others
11. **How is your familial economic condition?**  
 Liability, difficult to afford the daily expense  
 Sometimes difficult to afford the daily expense, mostly could maintain daily living  
 Balanced  
 More than balanced, has some deposit  
 Well-off  
 Affluent

II. Please describe your life experiences and feeling. (Please choose yes, no or not sure for following situations)

|                                                                                                                                                       | Yes | No | Not sure |
|-------------------------------------------------------------------------------------------------------------------------------------------------------|-----|----|----------|
| 1. Have you ever stolen anything? (ex. stole money or things from others; stole things from stores)                                                   |     |    |          |
| 2. Did you ever run away from home overnight or once without returning for a lengthy period?                                                          |     |    |          |
| 3. Do you often tell lies or make up stories?                                                                                                         |     |    |          |
| 4. Have you ever set up fire intentionally?                                                                                                           |     |    |          |
| 5. Have you ever skip classes or truant from school before college?                                                                                   |     |    |          |
| 6. Have you ever broken into someone else's house or car?                                                                                             |     |    |          |
| 7. Have you ever destroyed others' property intentionally? (like break the window, scratch cars)                                                      |     |    |          |
| 8. Have you ever been physically cruel to animals?                                                                                                    |     |    |          |
| 9. Have you ever forced someone into sexual activity or cause physical harms to someone in sexual activity?                                           |     |    |          |
| 10. Have you ever initiate physical fights?                                                                                                           |     |    |          |
| 11. Did you use weapons during fights? (ex. A bat, knife, iron bar)                                                                                   |     |    |          |
| 12. Did you ever trick or threaten others to obtain their properties?                                                                                 |     |    |          |
| 13. Have you ever hurt others intentionally? (ex. During fight or being physically cruel to others)                                                   |     |    |          |
| 14. Did you stay out at night despite parental prohibitions?                                                                                          |     |    |          |
| 15. Did you ever bully others? (including threaten, intimidate, torture, harassment, tease, bully others and cause suffering)                         |     |    |          |
| 16. Do you often loss your temper or could not control yourself to be mad at others and will shout, throw things or cause damage?                     |     |    |          |
| 17. Was there ever a time you would argue or talk back a lot with adults, your parents or teachers?                                                   |     |    |          |
| 18. Do you often deliberately defy or disobey adults' requests or rules? (ex. Often refuse to do the things that your parents/teachers ask you to do) |     |    |          |
| 19. Often deliberately annoy others.                                                                                                                  |     |    |          |
| 20. When you did something wrong, you would often blame others for your misbehavior.                                                                  |     |    |          |
| 21. People easily make you annoyed, or you are easily being offended by others.                                                                       |     |    |          |
| 22. You are often angry or resentful.                                                                                                                 |     |    |          |
| 23. You have been spiteful or vindictive.                                                                                                             |     |    |          |
| 24. When my friends invite me to KTV or karaoke, I will definitely go.                                                                                |     |    |          |
| 25. I will definitely go to internet café with or without invitation.                                                                                 |     |    |          |
| 26. When there is house party, I will definitely go.                                                                                                  |     |    |          |

|                                                                                   | Yes | No | Not sure |
|-----------------------------------------------------------------------------------|-----|----|----------|
| 27. When there is a chance to go to nightclub or pub, I will definitely go.       |     |    |          |
| 28. When there is a chance to go play pool or video arcade, I will definitely go. |     |    |          |

III. Have your friends/classmates had the following conditions? (please choose a suitable item: all, most, half, few or none)

|                                                                                   | All=4 | Most=3 | Half =2 | Few=1 | None=0 |
|-----------------------------------------------------------------------------------|-------|--------|---------|-------|--------|
| Study hard                                                                        |       |        |         |       |        |
| Follow the rules                                                                  |       |        |         |       |        |
| Habitual swearing                                                                 |       |        |         |       |        |
| Stealing, lying or extort                                                         |       |        |         |       |        |
| Intimidate, extort, sexual assault or bully others                                |       |        |         |       |        |
| Set on fire, engage in physical fight, abuse others or fight with weapons         |       |        |         |       |        |
| Destroy public property or infringe or destroy others' p property                 |       |        |         |       |        |
| Being suspended from school                                                       |       |        |         |       |        |
| Join gangs                                                                        |       |        |         |       |        |
| Being caught in the police station (except join student movement or car accident) |       |        |         |       |        |
| Smoking                                                                           |       |        |         |       |        |
| Chew betel nuts                                                                   |       |        |         |       |        |
| Excessive drinking                                                                |       |        |         |       |        |
| Ever use illicit substance                                                        |       |        |         |       |        |
| Often use sedatives                                                               |       |        |         |       |        |
| Often use prescription pain medicine                                              |       |        |         |       |        |
| Often use stimulant or refreshing drinks                                          |       |        |         |       |        |
